# Supplementary material
Source: PubMed Central journal article supplement (PMC5624318)
Supplement: NIHMS907330-supplement-supplement_1.pdf [file NIHMS907330-supplement-supplement_1.pdf]

## SUPPLEMENTARY FIGURE 1

Expression of genes related to pluripotency in various tissues of 8-week-old adult mice. (A) Expression of the pluripotency-related genes in various tissues of adult mice, detected by the 30-cycle RT-PCR. Weak expression of *Oct-4*, *Nanog*, and *Cripto* was detected in the ovaries. (B) Quantification of pluripotency-specific gene expression in mouse ovaries retrieved from different animals. The expression levels of *Oct-4*, *Nanog*, *Rex-1*, *Cripto*, *Tert*, *Lif Rc*, and *Dnmt3b* in the ovaries retrieved from different mice were measured by real-time PCR. Embryonic stem cells were used as the positive control cells. N/D, not detected.

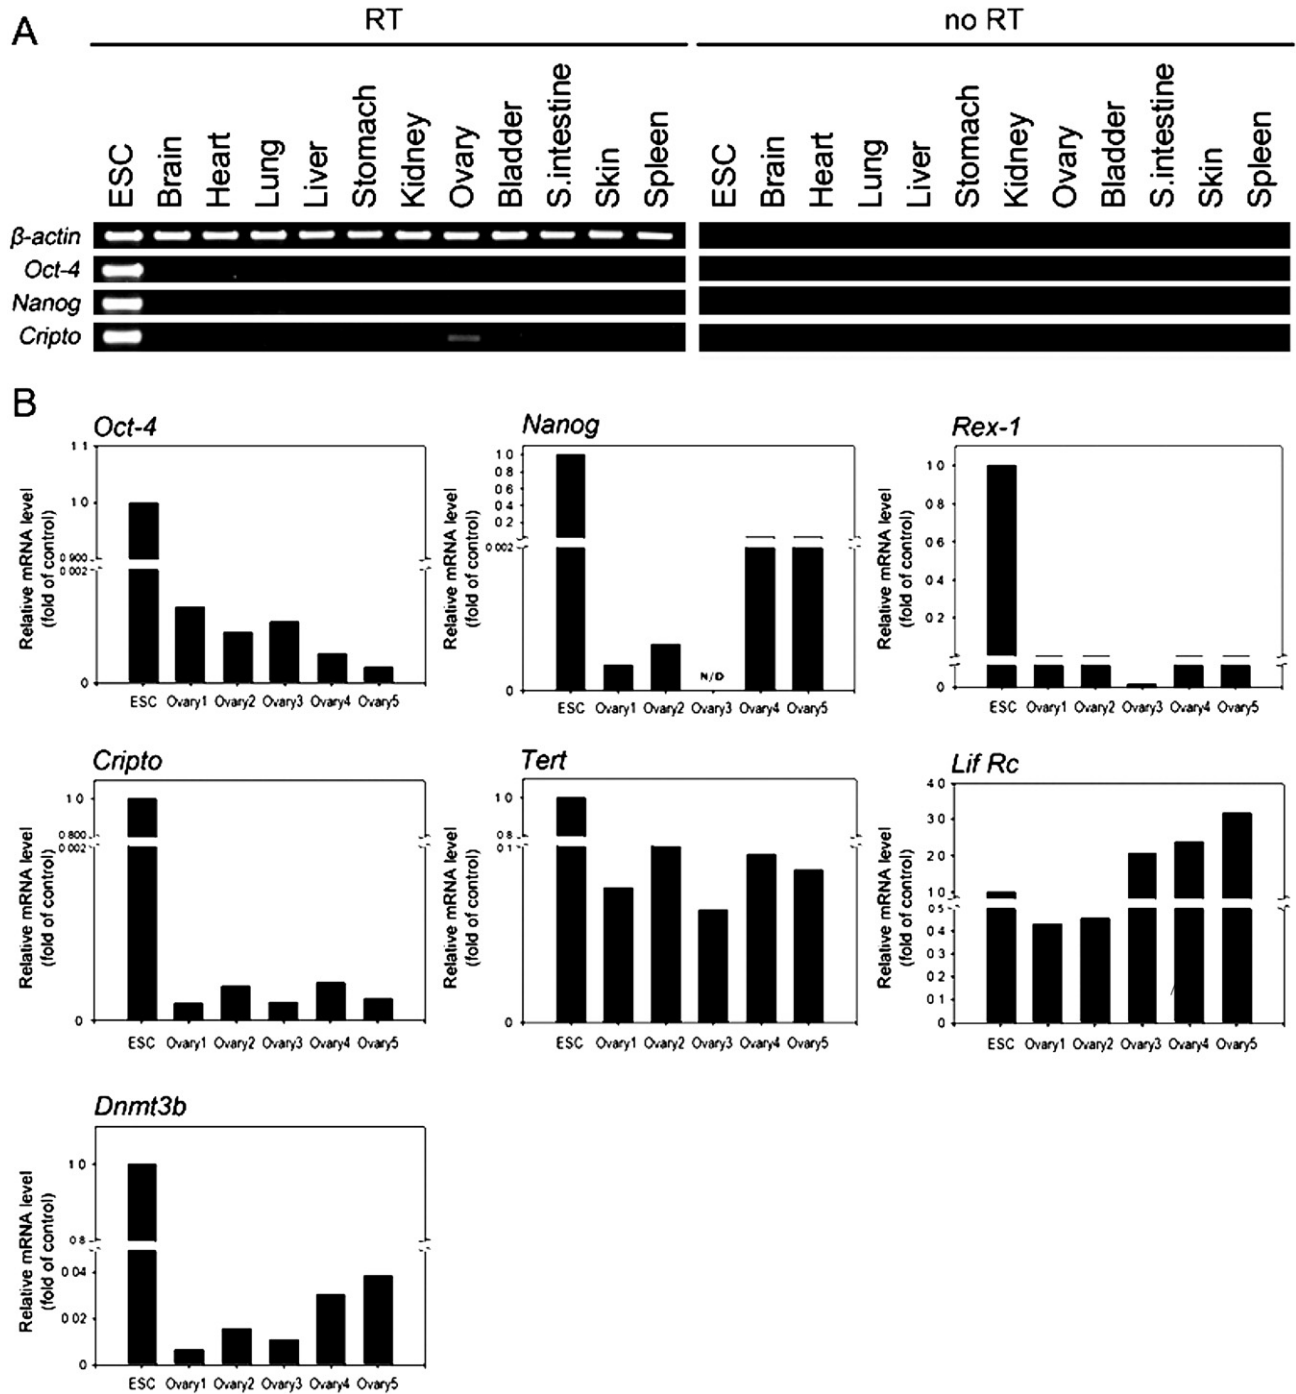

Gong. Stem cells from ovarian tissue. *Fertil Steril* 2010.

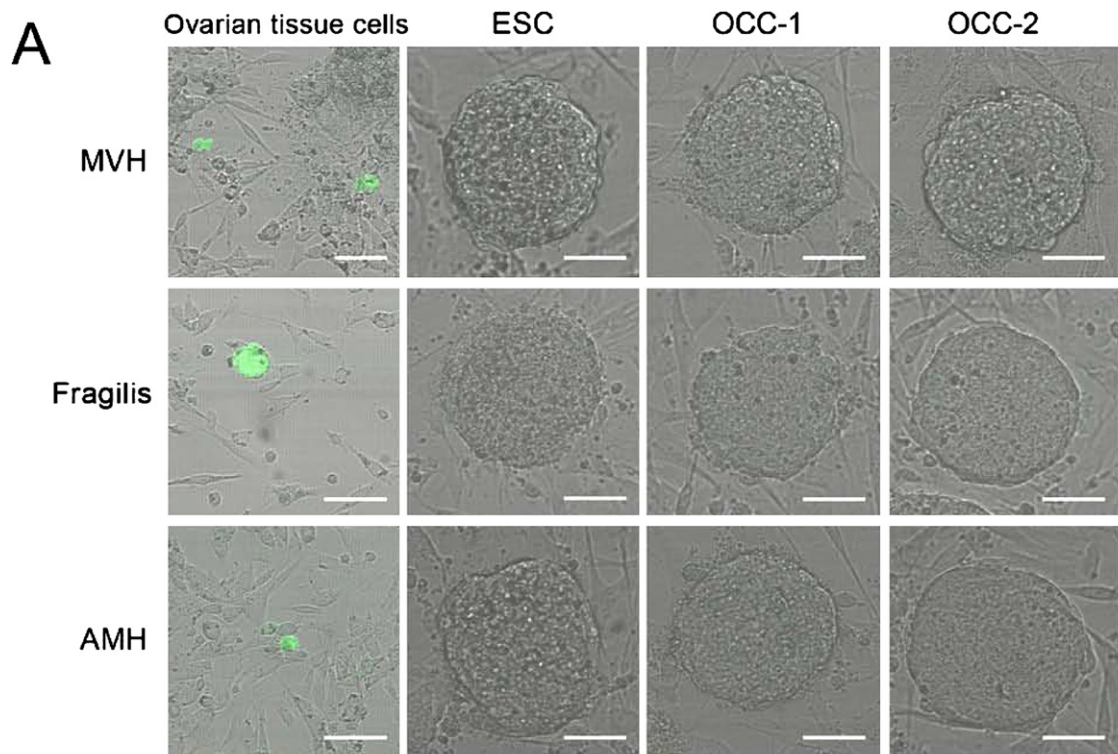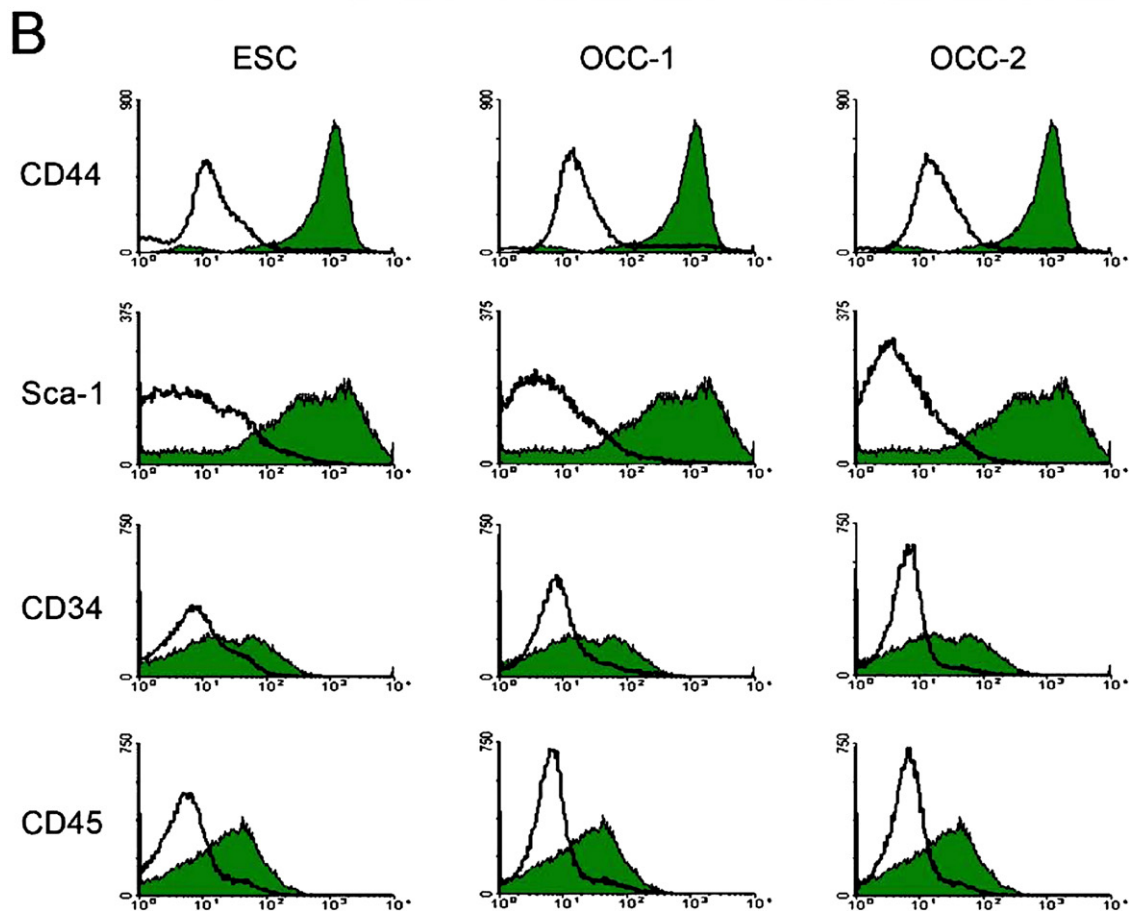

*Gong. Stem cells from ovarian tissue. Fertil Steril 2010.*

## SUPPLEMENTARY FIGURE 2 CONTINUED

Expression of the markers on germline, follicular, and adult stem cells. **(A)** Immunostaining of ovary-derived colony-forming cells (OCC) with antibodies against the germline markers mouse Vasa homolog (MVH) and Fragilis, and the follicular cell-specific marker antimüllerian hormone (AMH). Both lines of OCC were analyzed along with crude-dispersed ovarian cells before seeding, and embryonic stem cells (ESC) were used as control cells. Cells staining positive for MVH, Fragilis, or AMH were present in freshly dispersed adult ovarian cells; however, OCC retrieved at the 20th subpassage and ESC were not positive for those markers. Scale bar = 50  $\mu\text{m}$ . **(B)** Characterization of OCC by fluorescence-activated cell sorting (FACS) using mesenchymal cell-specific markers CD44 and Sca-1, and the hematopoietic stem cell-specific marker CD34 and CD45. The green color represents peaks of mesenchymal stem cells used as the control. Both ESC and OCC were negative for reactivity with anti-CD44, anti-Sca-1, anti-CD34, and anti-CD45 antibodies.

### SUPPLEMENTARY FIGURE 3

Culture of whole blood-derived mononuclear cells. Whole blood was retrieved from adult female mice by heart puncture, and only mononuclear cells were purified by density gradient. Isolated mononuclear cells (*arrowheads*) were cultured on an ICR feeder layer for 13 days. They proliferated as the monolayer starting on day 7, and no colony-forming cells were detected by the end of culture. Scale bar = 100  $\mu\text{m}$ .

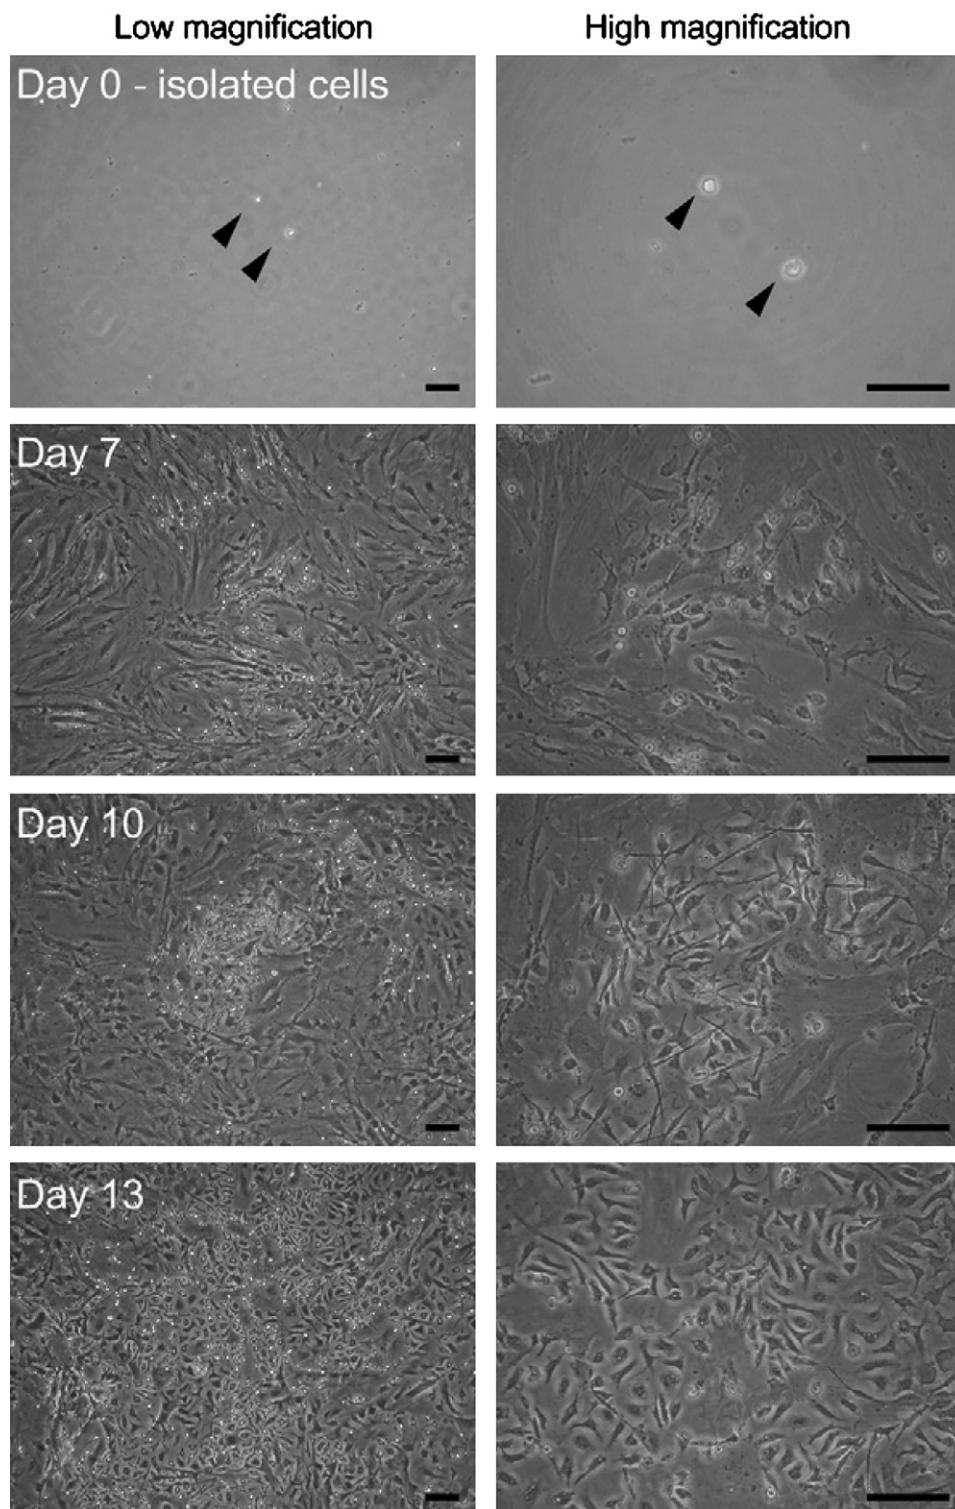

Gong. *Stem cells from ovarian tissue. Fertil Steril* 2010.

**SUPPLEMENTARY TABLE 1**

**Outcome of ovarian stromal cell coculture with feeder.**

| Repl | Ovarian cell <sup>a</sup> | Feeder cell <sup>b</sup> | Culture outcome                                         | Alternative supplements <sup>c</sup>  |
|------|---------------------------|--------------------------|---------------------------------------------------------|---------------------------------------|
| 1    | B6D2F1                    | ICR                      | Colony-like cell establishment (OCC-1)                  | None                                  |
| 2    | B6D2F1                    | ICR                      | Layer formation                                         | None                                  |
| 3    | B6D2F1                    | ICR                      | Layer formation                                         | None                                  |
| 4    | B6D2F1                    | ICR                      | Cell aggregate at P0 then disappear at P1               | None                                  |
| 5    | B6D2F1                    | ICR                      | Cell aggregate at P0 then disappear at P1               | None                                  |
| 6    | B6D2F1                    | ICR                      | Cell aggregate at P0                                    | None                                  |
| 7    | B6D2F1                    | ICR                      | Cell aggregate at P0                                    | None                                  |
| 8    | B6D2F1                    | ICR                      | Layer formation                                         | None                                  |
| 9    | B6D2F1                    | ICR                      | Layer formation                                         | None                                  |
| 10   | B6D2F1                    | ICR                      | Cell aggregate at P0                                    | None                                  |
| 11   | B6D2F1                    | ICR                      | Layer formation                                         | None                                  |
| 12   | B6D2F1                    | ICR                      | Cell aggregate at P0                                    | None                                  |
| 13   | B6D2F1                    | ICR                      | Cell aggregate at P0                                    | None                                  |
| 14   | B6D2F1                    | ICR                      | Cell aggregate at P0 then disappear at P1               | None                                  |
| 15   | B6D2F1                    | ICR                      | Cell aggregate at P0                                    | None                                  |
| 16   | B6D2F1                    | ICR                      | Layer formation                                         | None                                  |
| 17   | B6D2F1                    | ICR                      | Layer formation                                         | None                                  |
| 18   | B6D2F1                    | ICR                      | Layer formation                                         | None                                  |
| 19   | B6D2F1                    | ICR                      | Cell aggregate at P0                                    | None                                  |
| 20   | B6D2F1                    | ICR                      | Cell aggregate at P0                                    | LIF (1,000)                           |
| 20   | B6D2F1                    | ICR                      | Cell aggregate at P0                                    | LIF (5,000)                           |
| 21   | B6D2F1                    | ICR                      | Layer formation                                         | LIF (1,000)                           |
| 21   | B6D2F1                    | ICR                      | Layer formation                                         | LIF (5,000)                           |
| 22   | B6D2F1                    | ICR                      | Layer formation                                         | LIF (2,000)                           |
| 22   | B6D2F1                    | ICR                      | Layer formation                                         | LIF (3,000)                           |
| 23   | B6CBAF1                   | ICR                      | Cell aggregate at P0                                    | LIF (2,000)                           |
| 23   | B6CBAF1                   | ICR                      | Cell aggregate at P0                                    | LIF (3,000)                           |
| 24   | B6D2F1                    | ICR                      | Cell aggregate at P0 then disappear at P1               | LIF (3,000)+FSH (100)                 |
| 25   | B6CBAF1                   | ICR                      | Cell aggregate at P0                                    | LIF (3,000)+FSH (100)                 |
| 26   | B6D2F1                    | ICR                      | Cell aggregate at P0 then disappear at P1               | None                                  |
| 26   | B6D2F1                    | ICR                      | Cell aggregate at P0 then disappear at P1               | FSH (100)                             |
| 26   | B6D2F1                    | ICR                      | Cell aggregate at P0 then disappear at P1               | LH (10)                               |
| 27   | B6D2F1                    | ICR                      | Cell aggregate at P0 then disappear at P1               | FSH (100)+LH (10)                     |
| 28   | B6D2F1                    | ICR                      | Cell aggregate at P0 then disappear at P1               | cell strainer-/preculture-preculture- |
| 29   | B6D2F1                    | ICR                      | Cell aggregate at P0                                    | None                                  |
| 29   | B6D2F1                    | ICR                      | Cell aggregate at P0                                    | FSH (100)                             |
| 29   | B6D2F1                    | ICR                      | Cell aggregate at P0                                    | LH (10)                               |
| 29   | B6D2F1                    | ICR                      | Cell aggregate at P0                                    | FSH (100)+LH (10)                     |
| 30   | B6D2F1                    | ICR                      | Cell aggregate at P0                                    | cell strainer-/preculture-            |
| 31   | B6D2F1                    | ICR                      | Layer formation                                         | None                                  |
| 32   | B6D2F1                    | ICR                      | Cell aggregate at P0                                    | None                                  |
| 33   | B6D2F1                    | ICR                      | Layer formation                                         | None                                  |
| 34   | B6D2F1                    | ICR                      | Layer formation                                         | None                                  |
| 35   | B6D2F1                    | ICR                      | Cell aggregate at P0                                    | None                                  |
| 36   | B6D2F1                    | ICR                      | Colony-like cell dump until day 12 then disappear at P1 | None                                  |
| 37   | B6D2F1                    | ICR                      | Cell aggregate at P0                                    | None                                  |
| 38   | B6D2F1                    | ICR                      | Colony-like cell establishment (OCC-2)                  | None                                  |
| 39   | B6D2F1                    | ICR                      | Cell aggregate at P0                                    | preculture-                           |
| 40   | B6D2F1                    | ICR                      | Layer formation                                         | None                                  |
| 41   | C57BL/6                   | ICR                      | Layer formation                                         | 15 month-old mouse                    |
| 42   | B6CBAF1                   | ICR                      | Cell aggregate at P0                                    | 4 week-old mouse                      |
| 43   | B6CBAF1                   | ICR                      | Colony-like cell dump until day 18 then disappear at P1 | 2 week-old/preculture-                |
| 44   | B6D2F1                    | STO                      | Cell aggregate at P0                                    | LIF (1,000)                           |
| 45   | Balb/c                    | STO                      | Layer formation                                         | LIF (1,000)                           |
| 46   | B6CBAF1                   | STO                      | Layer formation                                         | LIF (1,000)                           |
| 47   | B6CBAF1                   | ICR                      | No vital cell                                           | A23187 (10 μM)                        |
| 48   | B6D2F1                    | ICR                      | Cell aggregate at P0                                    | A23187 (1 μM)                         |

All procedures were conducted according to standard protocol (green background) unless otherwise stated. The basic medium was DMEM supplemented with 0.1 mM β-mercaptoethanol, 1% nonessential amino acids, 2 mM L-glutamine, 15% fetal bovine serum, and 5,000 units/ml LIF unless otherwise stated.

<sup>a</sup>The ovary dissociated cells were prepared from the ovaries retrieved from 8 to 12 week-old mice unless otherwise stated.

<sup>b</sup>All somatic cells used as feeder cell layer were treated with mitomycin C.

<sup>c</sup>FSH=miU/ml; LIF=units/ml; A23187= μM; strainer=Without passing through cell strainer in cell isolation; preculture=no preculture was undertaken for preparing buoyant cell fraction

**Notes:** All procedures were conducted according to standard protocol (shaded background) unless otherwise stated. The basic medium was DMEM supplemented with 0.1 mM β-mercaptoethanol, 1% nonessential amino acids, 2 mM L-glutamine, 15% fetal bovine serum, and 5000 units/mL LIF unless otherwise stated.

<sup>a</sup> The ovary dissociated cells were prepared from the ovaries retrieved from 8- to 12-week-old mice unless otherwise stated.

<sup>b</sup> All somatic cells used as feeder cell layer were treated with mitomycin C.

<sup>c</sup> Follicle-stimulating hormone (FSH) = mIU/mL; leukemia inhibitory factor (LIF) = units/mL; A23187 = μM; strainer = without passing through cell strainer in cell isolation; preculture = no preculture was undertaken for preparing buoyant cell fraction.

Gong. *Stem cells from ovarian tissue. Fertil Steril* 2010.

**SUPPLEMENTARY TABLE 2**

Short-tandem repeat microsatellite analysis of established ovary-derived colony-forming cells (OCC) derived from coculturing ovarian cells and embryonic fibroblast feeder cells, and the strains of the ovary (B6D2F1) and feeder cell (ICR) donor.

| Markers               | Samples     |             |        |        |
|-----------------------|-------------|-------------|--------|--------|
|                       | Ovary donor | Feeder cell | OCC-1  | OCC-2  |
| D3Mit200 <sup>a</sup> |             |             |        |        |
| Size 1                | 101.09      | 124.24      | 100.96 | 100.95 |
| Size 2                | 124.22      | 126.21      | 124.11 | 124.19 |
| D11Mit4 <sup>a</sup>  |             |             |        |        |
| Size 1                | 248.92      | 242.8       | 248.97 | 249.07 |
| Size 2                | 285.39      | 248.98      | 285.44 | 285.53 |
| D19Mit33 <sup>a</sup> |             |             |        |        |
| Size 1                | 251.6       | 223.0       | 251.6  | 251.5  |
| Size 2                | 253.7       | —           | 253.5  | 253.5  |
| D4Mit251 <sup>a</sup> |             |             |        |        |
| Size 1                | 107.3       | 120.7       | 107.2  | 107.2  |
| Size 2                | 120.7       | —           | 120.7  | 120.6  |

<sup>a</sup> Microsatellite markers used were selected from MIT database for discerning mouse strains employed as ovary donor (B6D2F1) and feeder cells (ICR).

*Gong. Stem cells from ovarian tissue. Fertil Steril 2010.*

**SUPPLEMENTARY TABLE 3**
**Oligonucleotide primers and PCR cycling conditions.**

| Genes                   | GenBank number | Primer sequence                    |                                         | Size (bp) |
|-------------------------|----------------|------------------------------------|-----------------------------------------|-----------|
|                         |                | Sense (5' > 3')                    | Antisense (5' > 3')                     |           |
| <i>β-actin</i> (RT)     | X03672         | ACCGTGAAAAGATGACCCAG               | TCTCAGCTGTGGTGGTGAAG                    | 254       |
| <i>β-actin</i> (R-T)    | X03672         | TACCACAGGCATTGTGATGG               | TCTTTGATGTCACGCACGATT                   | 200       |
| <i>Oct-4</i> (RT, R-T)  | M34381         | GAAGCCCTCCCTACAGCAGA               | CAGAGCAGTGACGGGAACAG                    | 297       |
| <i>Nanog</i> (RT, R-T)  | AY455282       | CCCCACAAGCCTTGAATTA                | CTCAAATCCCAGCAACCACA                    | 255       |
| <i>Rex-1</i> (RT)       | M28382         | ACATCCTAACCCACGCAAAG               | TGATTTTCTGCCGTATGCAA                    | 294       |
| <i>Rex-1</i> (R-T)      | M28382         | TCCCCGTGAACATACACCA                | CTTCGTCGCCCTTTGTCAATGT                  | 247       |
| <i>Cripto</i> (RT)      | M87321         | CTTTAAGCAGGGAGGTGGTG               | TAAAGCCATCTGCCACAATG                    | 195       |
| <i>Cripto</i> (R-T)     | M87321         | CGGAGATCTTGGCTGCTAAC               | CTTCGACGGCTCGTAAAAAC                    | 200       |
| <i>Dnmt3b</i> (RT)      | BC105922       | AGTCCATCGCTGTGGGAACT               | GGGCGGGTATAATTCAGCAA                    | 226       |
| <i>Dnmt3b</i> (R-T)     | BC105922       | GTCCGGAAAATCACCAAGAA               | CCAGAAGAATGGACGGTTGT                    | 201       |
| <i>Tert</i> (RT)        | AF051911       | GGATCCTGGCTACGTTCTCTG              | TGCCTGACCTCCTTTGTGA                     | 208       |
| <i>Tert</i> (R-T)       | AF051911       | GCAGTGGTCCGGAGAGATAG               | ACACTGTGACGCAGGAAGTG                    | 224       |
| <i>Lif Rc</i> (RT, R-T) | BC031929       | GCTGAGTGGTAAAGATACCG               | TTCGTTGGACTCATACAACA                    | 261       |
| <i>Stat3</i> (RT)       | AY299489       | TTTGAATGAAGGGTACATC                | CAAATGACATGTTGTTTCAGC                   | 228       |
| <i>Bmp4</i> (RT)        | BC013459       | TGAGAGACCCAGCCTAAGA                | AAACTTGCTGGAAAGGCTCA                    | 259       |
| <i>Fgf4</i> (RT)        | BC104312       | CAGTCTTCTGGAGCTCTCTC               | AGGAAGTGGGTTACCTTCAT                    | 282       |
| <i>Foxd3</i> (RT)       | AF067421       | CAAGAACAGCCTGGTGAAG                | GTCCAGGGTCCAGTAGTTG                     | 262       |
| <i>Sox2</i> (RT)        | AB108673       | ACGCTCATGAAGAAGGATAA               | GTAGGACATGCTGTAGGTGG                    | 345       |
| <i>CD9</i> (RT)         | U60473         | ATGCTACCACTGTTTCCAAC               | ACAAGTTAAACTGGCAGCAT                    | 212       |
| <i>Gdf3</i> (RT)        | BC101963       | CGAGTTTCAAGACTCTGACC               | TAGAGGACCTTCTGGAGACA                    | 276       |
| <i>Zfy1</i> (gDNA)      | AC163622       | GTTACTCATTTTCAGGTGTTCTGGG          | GTGTCAGCTGTTATAGGATCAGTGA               | 572       |
| <i>Xist</i> (gDNA)      | AJ421479.1     | GAGATACATTTATTTGCTCA               | GACTTAGTTTGGTTTCTTTA                    | 540       |
| <i>Nanog</i> (gDNA)     | NC000072       | GATTTTGTAGGTGGGATTAATT<br>GTGAATTT | ACCAAAAAAACCCACACTCATATCAATATA          | 358       |
| <i>Oct-4</i> (gDNA)     | NC000083       | GGTTTTTTAGAGGATGGTTGAGTGG          | CCATCACCCCCACCTAATAAAAAATAA             | 458       |
| <i>H19</i> (gDNA)       | AF049091       | GGTGGTAAAGATGTGTGATTTTTGG          | CTAACTAACTTAAAAATCCCAAGACAAA<br>AAAAAAC | 508       |
| <i>Gtl2</i> (gDNA)      | NT_166318      | ATATTATGTTAGTGTTAGGAAGGATTGT       | GATGGTTAAAAATTTTTATAGATTGGGAATG         | 465       |
| <i>Snrpn</i> (gDNA)     | AF081460       | AATTTGTGTGATGTTTGAATTTTGG          | ATAAAATACACTTTCACTACTAAAATCC            | 420       |
| <i>Peg3</i> (gDNA)      | AF105262       | TTTTGTAGAGGATTTTGATAAGGAGG         | CCCCAACACCATCTAAACTCTAC                 | 288       |

Notes: gDNA, genomic DNA PCR; RT, reverse-transcriptase PCR; R-T, real-time PCR.

Gong. Stem cells from ovarian tissue. Fertil Steril 2010.
